# Supplementary material for: Most RNAs regulating ribosomal protein biosynthesis in Escherichia coli are narrowly distributed to Gammaproteobacteria
Source: PubMed Central journal article supplement — Nucleic Acids Res. 2013 Feb 7;41(6):3491–503. doi: 10.1093/nar/gkt055 (PMC3616713; doi:10.1093/nar/gkt055), 2013-02-07
Supplement: supp_gkt055_nar-02964-n-2012-File006.pdf [file supp_gkt055_nar-02964-n-2012-File006.pdf]

|               |                                                               |    |
|---------------|---------------------------------------------------------------|----|
| Bsu_reference | AAGGTACGTCCTGGACTTATCCAAGGCAACTAGCATGATATTTTCGTCATTCATATAAAGA | 60 |
| L1-1          | AGCACGAGGACACTGACATGGACTGAAGGAGTAGAAA-----                    | 37 |
| L1-2          | AGCACGAGGACACTGACATGGACTGAAGGAGTAGAAA-----                    | 37 |
| L1-3          | AGCACGAGGACACTGACATGGACTGAAGGAGTAGAAA-----                    | 37 |
| L1-4          | AGCACGAGGACACTGACATGGACTGAAGGAGTAGAAAATATTTTCGTCATTCATATAAAGA | 60 |
| L1-5          | AGCACGAGGACACTGACATGGACTGAAGGAGTAGAAA-----                    | 37 |
| L11-1         | AGCACGAGGACACTGACATGGACTGAAGGAGTAGAAAATATTTTCGTCATTCATATAAAGA | 60 |
| L11-2         | AGCACGAGGACACTGACATGGACTGAAGGAGTAGAAA-----                    | 37 |
| L11-3         | AGCACGAGGACACTGACATGGACTGAAGGAGTAGAAA-----                    | 37 |
| L11-4         | AGCACGAGGACACTGACATGGACTGAAGGAGTAGAAA-----                    | 37 |
| L11-5         | AGCACGAGGACACTGACATGGACTGAAGGAGTAGAAA-----                    | 37 |
| L11-6         | AGCAGGAGGACAATGACATGGAATGAAGGAGTAGAAA-----                    | 37 |
| L11-7         | AGCACGAGGACACTGACATGGACTGAAGGAGTAGAAA-----                    | 37 |
| L11-8         | AGCACGAGGACACTGACATGGACTGAAGGAGTAGAAA-----                    | 37 |
| L11-9         | AGCACGAGGACAGTGACATGGATCGACGGAGTAGAAAAG-----                  | 38 |
| L11-10        | AGCAC-AGGACACTGACATGGACTGAAGGAGTAGAAA-----                    | 36 |
| L11-11        | AGCACGAGGTCACTGACATGGACTGAAGGAGTAGAAA-----                    | 37 |

|               |                                                              |     |
|---------------|--------------------------------------------------------------|-----|
| Bsu_reference | ATGAAACCTTGAGTGGGAGGGTTTACCCTATTACCACATCACGGACTTAAGGAGGTGTGT | 120 |
| L1-1          | -----GACTTAAGGAGGTGTGT                                       | 54  |
| L1-2          | -----GACTTAAGGAGGTGTGT                                       | 54  |
| L1-3          | -----ACTTAAGGAGGTGTGT                                        | 53  |
| L1-4          | ATGAAACCTTGAGTGGGAGGGTTTACCCTATTACCACATCACGGACTTAAGGAGGTGTGT | 120 |
| L1-5          | -----GACTTAAGGAGGTGTGT                                       | 54  |
| L11-1         | ATGAAACCTTGAGTGGGAGGGTTTACCCTATTACCACATCACGGACTTAAGGAGGTGTGT | 120 |
| L11-2         | -----GACTTAAGGAGGTGTGT                                       | 54  |
| L11-3         | -----GGACTTAAGGAGGTGTGT                                      | 55  |
| L11-4         | -----TTGAGTGGGAGGGTTTACCCTATTACCACATCACGGACTTAAGGAGGTGTGT    | 89  |
| L11-5         | -----GACTTAAGGAGGTGTGT                                       | 54  |
| L11-6         | -----CTTAAGGAGGTGTGT                                         | 52  |
| L11-7         | -----GACTTAAGGAGGTGTGT                                       | 54  |
| L11-8         | -----GACTTAAGGAGGTGTGT                                       | 54  |
| L11-9         | -----CGAGTGGGAGGGTTTACCCTATTACCACATAACAGACTTAAGGAGGTGTGT     | 89  |
| L11-10        | -----TTGAGTGGGAGGG-TTACCCTATTACCACATCACGGACTTAAGGAGGTGTGT    | 87  |
| L11-11        | -----GGACTTAAGGAGGTGTGT                                      | 55  |

|               |                                                                |     |
|---------------|----------------------------------------------------------------|-----|
| Bsu_reference | CTCGTGGCTAAAAAAGTAGTTAAAGTTGTA AAAATTGCAAATTCCTGCTGGAAAAGCTAAC | 180 |
| L1-1          | CTCGTGGCTAAAAAAGTAGTTAAAGTTGTA AAAATTGCAAATTCCTGCTGGAAAAGCTAAC | 114 |
| L1-2          | CTCGTGGCTAAAAAAGTAGTTAAAGTTGTA AAAATTGCAAATTCCTGCTGGAAAAGCTAAC | 114 |
| L1-3          | CTCGTGGCTAAAAAAGTAGTTAAAGTTGTA AAAATTGCAAATTCCTGCTGGAAAAGCTAAC | 113 |
| L1-4          | CTCGTGGCTAAAAAAGTAGTTAAAGTTGTA AAAATTGCAAATTCCTGCTGGAAAAGCTAAC | 180 |
| L1-5          | CTCGTGGCTAAAAAAGTAGTTAAAGTTGTA AAAATTGCAAATTCCTGCTGGAAAAGCTAAC | 114 |
| L11-1         | CTCGTGGCTAAAAAAGTAGTTAAAGTTGTA AAAATTGCAAATTCCTGCTGGAAAAGCTAAC | 180 |
| L11-2         | CTCGTGGCTAAAAAAGTAGTTAAAGTTGTA AAAATTGCAAATTCCTGCTGGAAAAGCTAAC | 114 |
| L11-3         | CTCGTGGCTAAAAAAGTAGTTAAAGTTGTA AAAATTGCAAATTCCTGCTGGAAAAGCTAAC | 115 |
| L11-4         | CTCGTGGCTAAAAAAGTAGTTAAAGTTGTA AAAATTGCAAATTCCTGCTGGAAAAGCTAAC | 149 |
| L11-5         | CTCGTGGCTAAAAAAGTAGTTAAAGTTGTA AAAATTGCAAATTCCTGCTGGAAAAGCTAAC | 114 |
| L11-6         | CTCGTGGCTAAAAAAGTAGTTAAAGTTGTA AAAATTGCAAATTCCTGCTGGAAAAGCTAAC | 112 |
| L11-7         | CTCGTGGCTAAAAAAGTAGTTAAAGTTGTA AAAATTGCAAATTCCTGCTGGAAAAGCTAAC | 114 |
| L11-8         | CTCGTGGCTAAAAAAGTAGTTAAAGTTGTA AAAATTGCAAATTCCTGCTGGAAAAGCTAAC | 114 |
| L11-9         | CTCGTGGCTAAAAAAGTAGTTAAAGTTGTA AAAATTGCAAATTCCTGCTGGAAAAGCTAAC | 149 |
| L11-10        | CTCGTGGCTAAAAAAGTAGTTAAAGTTGTA AAAATTGCAAATTCCTGCTGGAAAAGCTAAC | 147 |
| L11-11        | CTCGTGGCTAAAAAAGTAGTTAAAGTTGTA AAAATTGCAAATTCCTGCTGGAAAAGCTAAC | 115 |

|               |                                                              |     |
|---------------|--------------------------------------------------------------|-----|
| Bsu_reference | CCAGCACCACCAGTTGGACCTGCACTTGGTCAAGCCGGTGTTAACATCATGGGATTCTGT | 240 |
| L1-1          | CCAGCACCACCAGTTGGACCTGCACTTGGTCAAGCCGGTGTTAACATCATGGGATTCTGT | 174 |
| L1-2          | CCAGCACCACCAGTTGGACCTGCACTTGGTCAAGCCGGTGTTAACATCATGGGATTCTGT | 174 |
| L1-3          | CCAGCACCACCAGTTGGACCTGCACTTGGTCAAGCCGGTGTTAACATCATGGGATTCTGT | 173 |
| L1-4          | CCAGCACCACCAGTTGGACCTGCACTTGGTCAAGCCGGTGTTAACATCATGGGATTCTGT | 240 |
| L1-5          | CCAGCACCACCAGTTGGACCTGCACTTGGTCAAGCCGGTGTTAACATCATGGGATTCTGT | 174 |
| L11-1         | CCAGCACCACCAGTTGG-----                                       | 203 |
| L11-2         | CCAGCACCACCAGTTGG-----                                       | 131 |
| L11-3         | CCAGCACCACCAGTTGG-----                                       | 132 |
| L11-4         | CCAGCACCACCAGTTGG-----                                       | 165 |
| L11-5         | CCAGCACCACCAGTTGG-----                                       | 131 |
| L11-6         | CCAGCACCACCAGTTGG-----                                       | 129 |
| L11-7         | CCAGCACCACCAGTTGG-----                                       | 131 |
| L11-8         | CCAGCACCACCAGTTGG-----                                       | 131 |
| L11-9         | CCAGCACCACCAGTTGG-----                                       | 166 |
| L11-10        | CCAGCACCACCAGTTGG-----                                       | 164 |
| L11-11        | CCAGCACCACCAGTTGG-----                                       | 132 |
| <br>          |                                                              |     |
| Bsu_reference | AAGGAGTTTAAACGCTCGTACAGCTGACCAAGCTGGTTAATCATTCTGTTGAAATTCG   | 300 |
| L1-1          | AAGGAGTTTAAACGCTCGTACAGCTGACCAAGCTGGTTAATCATTCTGTTGAAATTCG   | 234 |
| L1-2          | AAGGAGTTTAAACGCTCGTACAGCTGACCAAGCTGGTTAATCATTCTGTTGAAATTCG   | 234 |
| L1-3          | AAGGAGTTTAAACGCTCGTACAGCTGACCAAGCTGGTTAATCATTCTGTTGAAATTCG   | 233 |
| L1-4          | AAGGAGTTTAAACGCTCGTACAGCTGACCAAGCTGGTTAATCATTCTGTTGAAATTCG   | 299 |
| L1-5          | AAGGAGTTTAAACGCTCGTACAGCTGACCAAGCTGGTTAATCATTCTGTTGAAATTCG   | 234 |
| <br>          |                                                              |     |
| Bsu_reference | GTTTACGAAGACCGTTCATTTACATTTATTACAAAACTCCACCTGCTGCAGTATTGCTT  | 360 |
| L1-1          | GTTTACGAAGACCGTTCATTTACATTTATTACAAAACTCCACCTGCTGCAGTATTGCTT  | 294 |
| L1-2          | GTTTACGAAGACCGTTCATTTACATTTATTACAAAACTCCACCTGCTGCAGTATTGCTT  | 294 |
| L1-3          | GTTTACGAAGACCGTTCATTTACATTTATTACAAAACTCCACCTGCTGCAGTATTGCTT  | 293 |
| L1-4          | GTTTACGAAGACCGTTCATTTACATTTATTACAAAACTCCACCTGCTGCAGTATTGCTT  | 359 |
| L1-5          | GTTTACGAAGACCGTTCATTTACATTTATTACAAAACTCCACCTGCTGCAGTATTGCTT  | 294 |
| <br>          |                                                              |     |
| Bsu_reference | AAAAAAGCAGCTGGAATTGAGTCTGGTCTGGTGAACCAAACCGTAATAAAGTGGCAACC  | 420 |
| L1-1          | AAAAAAGCAGCTGGAATTGAGTCTGGTCTGGTGAACCAAACCGTAATAAAGTGGCAACC  | 354 |
| L1-2          | AAAAAAGCAGCTGGAATTGAGTCTGGTCTGGTGAACCAAACCGTAATAAAGTGGCAACC  | 354 |
| L1-3          | AAAAAAGCAGCTGGAATTGAGTCTGGTCTGGTGAACCAAACCGTAATAAAGTGGCAACC  | 353 |
| L1-4          | AAAAAAGCAGCTGGAATTGAGTCTGGTCTGGTGAACCAAACCGTAATAAAGTGGCAACC  | 419 |
| L1-5          | AAAAAAGCAGCTGGAATTGAGTCTGGTCTGGTGAACCAAACCGTAATAAAGTGGCAACC  | 354 |
| <br>          |                                                              |     |
| Bsu_reference | GTTAAGCGGATAAAGTACGCGAAATCGCTGAAACGAAAATGCCTGACTTAAACGCAGCA  | 480 |
| L1-1          | GTTAAGCGGATAAAGTACGCGAAATCGCTGAAACGAAAATGCCTGACTTAAACGCAGCA  | 414 |
| L1-2          | GTTAAGCGGATAAAGTACGCGAAATCGCTGAAACGAAAATGCCTGACTTAAACGCAGCA  | 414 |
| L1-3          | GTTAAGCGGATAAAGTACGCGAAATCGCTGAAACGAAAATGCCTGACTTAAACGCAGCA  | 413 |
| L1-4          | GTTAAGCGGATAAAGTACGCGAAATCGCTGAAACGAAAATGCCTGACTTAAACGCAGCA  | 479 |
| L1-5          | GTTAAGCGGATAAAGTACGCGAAATCGCTGAAACGAAAATGCCTGACTTAAACGCAGCA  | 414 |
| <br>          |                                                              |     |
| Bsu_reference | GACGTTGAAGCGGCAATGCGCATGGTTGAAGGTACTGCCCGCAGTATGGGTATTGTAATC | 540 |
| L1-1          | GACGTTGAAGCGGCAATGCGCATGGTTGAAGGTACTGCCCGCAGTATGGGTATTGTAATC | 474 |
| L1-2          | GACGTTGAAGCGGCAATGCGCATGGTTGAAGGTACTGCCCGCAGTATGGGTATTGTAATC | 474 |
| L1-3          | GACGTTGAAGCGGCAATGCGCATGGTTGAAGGTACTGCCCGCAGTATGGGTATTGTAATC | 473 |
| L1-4          | GACGTTGAAGCGGCAATGCGCATGGTTGAAGGTACTGCCCGCAGTATGGGTATTGTAATC | 539 |
| L1-5          | GACGTTGAAGCGGCAATGCGCATGGTTGAAGGTACTGCCCGCAGTATGGGTATTGTAATC | 474 |
| <br>          |                                                              |     |
| Bsu_reference | GAGGATTAATTTGTTTCTTGTCGGGTTGCGAGTTTTAACAGTTCGCAACCCTTATTCGT  | 600 |
| L1-1          | GAGGATTAATTTGTTTCTTGTCGGGTTGCGAGTTTTAACANNTTCGCAACCCTTATTCNT | 534 |
| L1-2          | GAGGATTAATTTGTTTCTTGTCGGGTTGCGAGTTTTAACAGTTCGCAACCCTTATTCGT  | 534 |
| L1-3          | GAGGATTAATTTGTTTCTTGTCGGGTTGCGAGTTTTAACAGTTCGCAACCCTTATTCGT  | 533 |
| L1-4          | GAGGATTAATTTGTTTCTTGTCGGGTTGCGAGTTTTAACAGTTCGCAACCCTTATTCGT  | 599 |
| L1-5          | GAGGATTAATTTGTTTCTTGTCGGGTTGCGAGTTTTAACAGTTCGCAACCCTTATTCGT  | 534 |

|               |                                                                                   |
|---------------|-----------------------------------------------------------------------------------|
| Bsu_reference | <b>GGGAGGTTATTCCGCTATAACCAC</b> ATAAGGAGGAAATTTTAAA <b>ATG</b> GCTAAAAAAGGTAA 660 |
| L1-1          | GGGAGGTTATTCCGCTNTNCCACNTAANGAGGAAATTTTA----- 575                                 |
| L1-2          | GGGAGGTTATTCCGCTATAACCACATAAGGAGGAAATTTTAAAATGGCTAAAAAAGGTAA 594                  |
| L1-3          | GGGACGTTATTCCGCTATAACCACATAAGGAGGAAATTTTAAAATGGCTAAAAAAGGTAA 593                  |
| L1-4          | GGGAGGTTATTCCGCTATAACCACATAAGGAGGAAATTTTAAAATGGCTAAAAAAGGTAA 659                  |
| L1-5          | GGGAGGTTATTCCG----- 548                                                           |
|               |                                                                                   |
| Bsu_reference | AAAGTACGTTGAAGCTGCTAAGCTTGTAGACCG 693                                             |
| L1-1          | -----                                                                             |
| L1-2          | AAAGTACGTTGAAGCTGCTAAGCTTGTAGACCG 627                                             |
| L1-3          | AAAGTACGTTGAAGCTGCTAAGCTTGTAGACCG 626                                             |
| L1-4          | AAAGTACGTTGAAGCTGCTAAGCTTGTAGACCG 692                                             |
| L1-5          | -----                                                                             |

**Supplementary Figure 1:** Summary of 5'-RACE results from gene specific primers within *rplA* (L1) and *rplK* (L11). Regions corresponding to primer sequences are underlined on the *Bacillus subtilis* genome reference sequence (gene specific primers), the sequence of the 5'-linker is indicated by italics on the sequences obtained. Bolded regions correspond to translation initiation codons (GTG and ATG) and to the putative structured RNA portions of the sequence. Sequences for L1 that do not extend to the 3' gene specific primer (L1-1, and L1-5) are the result of short sequencing reads. All L11 reads are trimmed to the 3' primer within *rplK*.
